# Transcranial photoacoustic imaging of NMDA-evoked focal circuit dynamics in rat hippocampus

1 Jeeun Kang<sup>1,2</sup>, Shilpa D. Kadam<sup>3</sup>, Joshua S. Elmore<sup>1</sup>, Brennan J. Sullivan<sup>4,\*</sup>, Heather Valentine<sup>1,\*</sup>,  
2 Adarsha P. Malla<sup>5</sup>, Maged M. Harraz<sup>5</sup>, Arman Rahmim<sup>1,6</sup>, Jin U. Kang<sup>2,7</sup>, Leslie M. Loew<sup>8</sup>, Michael  
3 Baumann<sup>9</sup>, Anthony A. Grace<sup>10</sup>, Albert Gjedde<sup>1,11,12,13</sup>, Emad M. Boctor<sup>1,2,7,14,†</sup>, Dean F.  
4 Wong<sup>1,5,15,16,†</sup>

5 <sup>1</sup> Russell H. Morgan Department of Radiology and Radiological Science, Johns Hopkins University,  
6 Baltimore, MD, USA.

7 <sup>2</sup> Laboratory of Computational Sensing and Robotics, Whiting School of Engineering, Johns Hopkins  
8 University, Baltimore, MD, USA

9 <sup>3</sup> Neuroscience Laboratory, Hugo W. Moser Research Institute at Kennedy Krieger & Department of  
10 Neurology, Johns Hopkins Medical Institutions, Baltimore, MD, USA

11 <sup>4</sup> Neuroscience Laboratory, Hugo W. Moser Research Institute at Kennedy Krieger, Baltimore, MD,  
12 USA

13 <sup>5</sup> The Solomon H. Snyder Department of Neuroscience, Johns Hopkins University School of  
14 Medicine, Baltimore, MD, USA

15 <sup>6</sup> Departments of Radiology and Physics, University of British Columbia, Vancouver, BC, Canada

16 <sup>7</sup> Department of Electrical and Computer Engineering, Whiting School of Engineering, Johns  
17 Hopkins University, Baltimore, MD, USA

18 <sup>8</sup> Department of Cell Biology, University of Connecticut Health, Farmington, CT, USA

19 <sup>9</sup> National Institute on Drug Abuse, Intramural Research Program, NIH, Baltimore, MD

20 <sup>10</sup> Departments of Neuroscience, Psychiatry and Psychology, University of Pittsburgh, Pittsburgh,  
21 PA, USA

22 <sup>11</sup> Department of Neurology and Neurosurgery, McGill University, Montreal, Quebec, Canada

23 <sup>12</sup> Departments of Clinical Research and Nuclear Medicine, Odense University Hospital and  
24 University of Southern Denmark, Odense, Denmark

25 <sup>13</sup> Department of Neuroscience, University of Copenhagen, Copenhagen, Denmark

26 <sup>14</sup> Department of Computer Science, Whiting School of Engineering, Johns Hopkins University,  
27 Baltimore, MD, USA

28 <sup>15</sup> Department of Psychiatry and Behavioral Sciences, Johns Hopkins Medical Institutions, Baltimore,  
29 MD, USA

30 <sup>16</sup> Department of Neurology, Johns Hopkins Medical Institutions, Baltimore, MD, USA

31 \* **Equal contribution**

32 † **These authors share senior authorship and address all correspondence to: Dean F. Wong, E-**  
33 **mail: [dfwong@jhmi.edu](mailto:dfwong@jhmi.edu) and to Emad M. Boctor, E-mail: [eboctor1@jhmi.edu](mailto:eboctor1@jhmi.edu).**

34 **Keywords: Photoacoustic, neuroimaging, voltage-sensitive dye imaging, microdialysis,**  
35 **quantitative electroencephalogram, N-methyl-D-aspartate, glutamate, hippocampus**

## 36 **Abstract**

37 Transcranial functional photoacoustic (fPA) voltage-sensitive dye (VSD) imaging promises to  
38 overcome current temporal and spatial limitations of current neuroimaging modalities. The technique  
39 previously distinguished global seizure activity from control neural activity in groups of rats. To  
40 validate the focal specificity of transcranial fPA neuroimaging *in vivo*, we now present proofs-of-  
41 concept that the results differentiate between low- and high-dose N-methyl-D-aspartate (NMDA)  
42 evoked neural activity in rat hippocampus. Concurrent quantitative EEG (qEEG) and microdialysis  
43 recorded real-time circuit dynamics and glutamate concentration change, respectively. We  
44 hypothesized that location-specific fPA VSD contrast would identify the neural dynamics in  
45 hippocampus with the correlation to NMDA evoked focal glutamate release and time-specific EEG  
46 signals. To test the hypothesis, we infused 0.3 to 3.0 mM NMDA at 2  $\mu$ l/min over 60 min via an  
47 implanted microdialysis probe. The dialysate samples collected every 20 min during the infusion  
48 were analyzed for focal changes in extracellular glutamate release. Transcranial fPA VSD imaging  
49 provided NMDA-evoked VSD responses with positive correlation to extracellular glutamate  
50 concentration change at the contralateral side of the microdialysis probe. The graded response  
51 represents the all-or-none gating system of the dentate gyrus (DG) in hippocampus. Quantitative  
52 EEG (qEEG) successfully confirmed induction of focal seizure activity during NMDA infusion. We  
53 conclude that transcranial fPA VSD imaging distinguished graded DG gatekeeping functions, based  
54 on the VSD redistribution mechanism sensitive to electrophysiologic membrane potential. The results  
55 suggest the potential future use of this emerging technology in clinics and science as an innovative  
56 and significant functional neuroimaging modality.

57

## 58 Introduction

59 Whereas electrophysiological and invasive neurochemical techniques have been valuable in assessing  
60 activity within specific neural circuits in brain, there is a distinct need for a non-invasive means to  
61 image real-time regional functional activity in deep brain *in vivo*. The hippocampal circuit has rows  
62 of excitatory pyramidal neurons all aligned in close proximity with similar orientation. The dentate  
63 gyrus (DG) is classically considered as a gate keeper for the propagation of excitatory activity into  
64 the hippocampus as the excitatory neurons of the DG are less excitable than other types of  
65 hippocampal neurons. Therefore, low amplitude excitatory inputs do not generate action potentials in  
66 DG neurons and fail to open the DG gate<sup>1</sup>. In contrast to sub-threshold excitatory stimulus, strong  
67 repetitive excitatory inputs can break the DG gate and induce seizure activity<sup>1</sup>. This all-or-none  
68 gating function of the DG is consistent with the hippocampus being the lowest seizure threshold  
69 region of the mammalian brain.

70 Previous optical imaging approaches to local cortical circuits<sup>2-4</sup> applied invasive procedures  
71 to overcome superficial imaging depth, and further extension to deeper brain regions such as the  
72 hippocampus was prohibitive. The imaging of electrophysiological or neurochemical dynamics  
73 within the hippocampus primarily has been accomplished by optical imaging of freshly-sliced brain  
74 tissue<sup>5</sup> or magnetic resonance imaging spectroscopy (MRS) for non-invasive quantification of  
75 glutamate at high spatial resolution<sup>6,7</sup>. However, optical neuroimaging and MRS suffer from shallow  
76 imaging depth and from slow imaging speed, respectively. The application of two-photon  
77 microscopy to measure calcium ion dynamics in specific deep brain structures, including  
78 hippocampus, has poor temporal resolution<sup>8</sup>. Therefore, non-invasive, real-time neuroimaging  
79 modality having a high spatiotemporal resolution would be a significant advance, but such an  
80 approach would require neurochemical and electrophysiological characterization to validate the  
81 neural activity.

82 Photoacoustic (PA) imaging is a hybrid approach combining optics and acoustics where the  
83 signal corresponding to the neural activity is detected in the form of acoustic transcranial imaging  
84 with optical absorbance as an image contrast<sup>9,10</sup>. PA imaging is based on thermo-elastic perturbation  
85 of a target evoked by light absorbance from a pulsed laser illumination, which generates radio-  
86 frequency (RF) acoustic pressure waves detected by piezoelectric ultrasound transduction or optical  
87 interferometry. With this unique imaging mechanism, several attractive applications have been  
88 proposed for preclinical and clinical research with tomographic and microscopic imaging modes,  
89 including detection of endogenous contrast of cancer indicators, e.g., melanoma<sup>11</sup>, breast  
90 microcalcifications<sup>12-14</sup>, monitoring of cancer angiogenesis<sup>15</sup>, oxygen metabolism<sup>16</sup>, and  
91 quantification of lipid content<sup>17,18</sup>, among others. Recently, we presented the functional PA (fPA)  
92 neuroimaging of near-infrared VSD redistribution mechanism differentiating the graded membrane  
93 potential in lipid vesicle model and chemo-convulsant seizure in rodent brain *in vivo*<sup>19</sup>.

94 Here, we validated the transcranial fPA neuroimaging of hippocampal electrophysiology  
95 activated by stimulation of N-methyl-D-aspartate (NMDA) receptors in rat brain *in vivo* through  
96 intact skull and scalp. The tri-modal neural sensing approach utilized microdialysis, quantitative  
97 electroencephalography (qEEG), and transcranial fPA neuroimaging to simultaneously monitor  
98 electrophysiological changes associated with glutamatergic neurotransmission (Figure 1). To  
99 stimulate the hippocampus, we infused NMDA by reverse microdialysis that triggered localized  
100 changes of extracellular glutamate concentration. We quantified the change of extracellular glutamate  
101 concentration evoked by reverse microdialysis by direct microdialysis and high-performance liquid  
102 chromatography (HPLC). We combined fPA neuroimaging and qEEG with microdialysis to evaluate

103 the effects associated with graded DG gatekeeping at hippocampus, in the presence of glutamatergic  
104 excitation. Concurrently, the electrophysiological signatures were captured with transcranial fPA  
105 neuroimaging. Each of the three modalities thus provided information with different degrees of  
106 specificity, including spatiotemporal specificity from fPA imaging, temporal specificity from qEEG,  
107 and neurochemical specificity from microdialysis in the target neural circuit.

108

## 109 **Results**

110 **Transcranial fPA neuroimaging of rat hippocampus.** Transcranial fPA neuroimaging of  
111 hippocampal circuit dynamics was performed during NMDA infusion at rat hippocampus (Figure 2).  
112 The representative fPA sagittal planes obtained at 790 nm presented a sufficient sensitivity at the  
113 depths of interest, i.e., 3.6 mm, at the contralateral position to the microdialysis probe (Figure 3a).  
114 The sagittal PA imaging plane of hippocampus revealed the cross-sections of transverse sinus and  
115 inferior cerebral vein in the superficial depth range (Figure 3b). From the temporal dimension, time-  
116 averaged VSD responses were reconstructed pixel-by-pixel for pre-injection phase (-10 – 0 min)  
117 followed by the results for time bins in 10 min interval: 0 – 10 min, 10 – 20 min, and 20 – 30 min.  
118 Note that the total recording duration (40 min) was limited by internal memory of the fPA  
119 neuroimaging system. Figure 3c shows the representative VSD responses in hippocampal cross-  
120 sections collected during 0.3 mM and 3.0 mM NMDA infusion. As a result, the hippocampus with  
121 0.3 mM NMDA infusion did not present such a significant change ( $n = 3$ ), which implies a failure to  
122 overcome the high activation threshold of DG gatekeeping with 0.3 mM NMDA infusion. Otherwise,  
123 the substantial amount of circuit dynamics was detected at hippocampus with 3.0 mM NMDA  
124 infusion ( $n = 6$ ). In the 3.0 mM NMDA infusion group, the peak VSD responses were presented  
125 during the first or second 10 min durations, and their peak intensities corresponds to the maximal  
126 glutamate concentration change measured in the microdialysis, e.g., 734.48 % and 493.91 % (center  
127 and right columns in Figure 3c). Further quantitative multi-modal correlation will be given in the  
128 following subsections.

129 **NMDA-evoked glutamatergic neurotransmission.** Intrahippocampal infusion of NMDA diluted  
130 into artificial cerebrospinal fluid at the required concentrations was performed through the  
131 microdialysis probe. Concentrations of glutamate release in the dialysate were calculated from  
132 values of three baseline samples collected at 20 min intervals before NMDA infusion. During  
133 infusion into hippocampus (bregma -3.8 mm, lateral 3 mm, depth 3.6 mm; Figure 4a), samples  
134 continued to be collected every 20 min for the remainder of the study. Glutamate release was  
135 calculated as a % of basal values. Figure 4b shows the effect of NMDA infusion on  
136 glutamate release in the hippocampus of anesthetized rats. The results demonstrate the dose-related  
137 response of NMDA infusion at 0.3 ( $n = 3$ ), 1.0 ( $n = 1$ ), and 3.0 mM ( $n = 6$ ) into the hippocampus,  
138 where 0.3 mM NMDA caused a  $17.93 \pm 19.05$  % increase in glutamate levels that remained elevated  
139 for the duration of the infusion; the 1.0-mM NMDA infusion appears to cause doubling of the  
140 glutamate levels in the hippocampus compared to baseline (i.e., 112.42 %). This increase observed at  
141 the 1.0-mM remained elevated through to the end of the NMDA infusion. However, at 3.0-mM, the  
142 NMDA infusion raised the glutamate level up to  $392.99 \pm 250.54$  %, above baseline level, which  
143 peaked during the second 20-min sampling period.

144 **EEG of electrophysiological activity in hippocampus.** The DG is a hippocampal region  
145 specifically subjected to a barrage of excitatory inputs. However, the majority of excitatory activity  
146 does not propagate through the DG and into the hippocampus as the DG performs a gating function<sup>1</sup>.

147 Excessive activation of the DG disrupts its gating function and induces acute seizures in naïve  
148 animals<sup>1</sup>. Hippocampal infusion of 3.0 mM NMDA induced a maximal VSD and significant rise in  
149 extracellular glutamate concentration, suggesting a potential break in the DG gate that may lead to  
150 acute seizure activity. We therefore utilized qEEG during the same hippocampal 3.0 mM NMDA  
151 infusion protocol to identify if the maximal VSD response and extracellular glutamate concentrations  
152 were associated with significant electrophysiological activity, a tri-modal approach that validates the  
153 temporal and spatial resolution of fPA imaging during focal NMDA infusion.

154 In patients with focal epilepsy, gamma and theta activity from scalp EEG are an indicator of  
155 the seizure onset zone and ictal onset<sup>20,21</sup>. Here, the temporal specificity of qEEG recorded circuit  
156 responses in real-time, before and after focal NMDA infusion. The 3.0 mM NMDA infusion into the  
157 hippocampal circuit induced focal seizure activity recorded on qEEG (Figure 4c black asterisk and  
158 S1). When NMDA was delivered to the hippocampal circuit by the microdialysis probe (Figure 4a)  
159<sup>22</sup>, a significant change in qEEG spectral power was presented, especially in the gamma range (Figure  
160 4c). In the theta range, spectral power increased during the seizure (Figure 4d) further supporting the  
161 identification of the focal seizure activity. The seizure trace on EEG demonstrated both a gamma and  
162 theta component (Figure 4f). Importantly, the ictal event occurred during the same temporal window  
163 as the maximum VSD response and the greatest increase in extracellular glutamate concentration.  
164 The dose-related VSD and extracellular glutamate concentration response with qEEG suggest that the  
165 3.0-mM NMDA infusion resulted in a break in the DG gate associated with focal seizure activity.

166 However, qEEG lacks spatial resolution, and recordings from deep brain structures cannot be  
167 isolated without implantation of invasive depth electrodes. Therefore, in order to maintain the tri-  
168 modal experimental paradigm we opted not to place depth electrodes. We made the stimulation  
169 focal, according to the previous proof-of-concept results by fPA detection onset of generalized  
170 seizures through an intact skull and scalp<sup>19</sup>.

171 **Quantitative multi-modal correlation.** The fPA VSD responses at the contralateral side to the  
172 microdialysis probe (blue dots in Figure 3c) were measured and plotted as a function of the  
173 corresponding changes in extracellular glutamate concentration (Figure 5). Note that the regions-of-  
174 interest ROIs to quantify the VSD responses were in 1 x 1 mm<sup>2</sup> size in the sagittal cross-section of rat  
175 hippocampus. The reference phase for VSD response quantification was obtained from the baseline  
176 phase: 5 – 10 min. In fPA imaging, 3.0 mM NMDA infusion at hippocampus yielded significant  
177 elevation of VSD response:  $0.08 \pm 0.35$ ,  $2.24 \pm 1.06$ , and  $1.17 \pm 1.56$  for baseline (-10 – 0 min), NMDA1  
178 (0 – 20 min), and NMDA2 (20 – 30 min) phases, respectively (Figure S2a). The increase of  
179 glutamate concentration change was correspondingly presented from  $-4.67 \pm 4.48$  %,  $369.75 \pm 254.91$   
180 %, to  $392.99 \pm 250.54$  %. In addition, when re-analyzing the data for -50 – 100 %, 100 – 500 %, and  
181 500 – 1,000 % bins of fractional glutamate concentration change, high positive correlation was  
182 obtained with VSD responses:  $0.38 \pm 0.55$  ( $n_{\text{sample}} = 9$ ),  $0.97 \pm 1.40$  ( $n_{\text{sample}} = 5$ ), and  $3.17 \pm 0.32$  ( $n_{\text{sample}}$   
183  $= 4$ ) for  $11.04 \pm 29.60$  %,  $279.85 \pm 141.64$  %, to  $666.49 \pm 73.63$  % of glutamate concentration changes  
184 (red lines in Figure 5). The goodness of fit ( $R^2$ ) among the mean values was 0.95 with slope and y-  
185 intercept at 0.12 and 0.00, respectively. The qEEG found the increased bursts of gamma power  
186 during 3.0 mM NMDA infusion, reaching up to ~261 % increase with a focal seizure (Figure 4c and  
187 S1). Otherwise, focal 0.3 mM NMDA infusion at hippocampus did not presented any circuit  
188 activity increase statistically significant. The VSD responses were  $-0.11 \pm 0.02$ ,  $-0.15 \pm 1.71$ , and  $-$   
189  $0.07 \pm 0.64$  in baseline, NMDA1, and NMDA2 phases, respectively, which are correlated to the low  
190 glutamate concentration changes in hippocampus:  $-1.65 \pm 6.90$  %,  $3.90 \pm 10.41$  %, and  $17.93 \pm 19.05$  %  
191 (Figure S2b). Also, the VSD responses presented strong positive correlation when re-analyzed in -10  
192 – 0 %, 0 – 10 %, and 10 – 50 % bins of fractional glutamate concentration changes:  $-1.00 \pm 1.00$ ,

193 0.10±0.35, and 0.58±0.48 ( $n_{\text{sample}} = 3$  for each) with -6.84±3.38 %, 4.43±4.05 %, and 22.59±11.64 %  
194 of fractional glutamate concentration changes, respectively (blue lines in Figure 5). The  $R^2$  was 0.88  
195 with slope and y-intercept at 0.05 and -0.46, respectively.

196 **Brain histology.** Brain tissue was extracted after all *in vivo* experimental protocols. The brain was  
197 frozen-sectioned into 300- $\mu\text{m}$  thickness slices and evaluated to confirm probe placement using the  
198 hemorrhage caused by the microdialysis probe insertion for the NMDA infusion and collections as a  
199 marker. Figure 6a shows the bright-field images of the coronal plane of the hippocampus at -3.8 mm  
200 from bregma, respectively. White arrows indicate the hemorrhage caused by the microdialysis probe  
201 positioned at the following coordinates in hippocampus: bregma -3.8 mm, lateral 3 mm, and depth  
202 3.6 mm. The VSD staining of brain tissue was confirmed with near-infrared fluorescence  
203 microscopy. Uniform VSD fluorescence was found in the VSD perfusion animal, while negative  
204 control (VSD-) presented negligible fluorescence emission (Figure 6b), which again confirms the  
205 results in our previous publication<sup>23</sup>.

206

## 207 Discussion

208 The application of fPA neuroimaging was expanded to neuroscience<sup>24-26</sup> as label-free transcranial  
209 fPA imaging of neurovascular coupling proposed as a means to quantify hemodynamic changes<sup>27,28</sup>.  
210 However, this approach does not yield quantitative neural activities that directly correspond to  
211 electrical activity. Hemoglobin provides an effective contrast signal in fPA neuroimaging, but the  
212 neurovascular coupling in brain is comparatively slow compared to electrophysiological neural  
213 activities. Instead, there has been extensive investigations into more effective exogenous contrast  
214 agents<sup>29-33</sup>. This approach has enabled several neuroimaging approaches with functional voltage  
215 sensors. Deán-Ben et al. showed real-time PA tomography of a genetically encoded calcium  
216 indicator, GCaMP5G, using zebrafish *in vivo*<sup>34</sup>. Sheryl Roberts, et al. also proposed a new  
217 metallochromic calcium sensor for PA imaging (CaSPA) which has a high extinction coefficient, a  
218 low quantum yield, and high photo-bleaching resistance for brain and heart imaging<sup>35</sup>. Ruo et al.  
219 reported PA imaging of neural activity evoked by electrical stimulation and 4-aminopyridine-induced  
220 epileptic seizures using hydrophobic anions such as dipicrylamine (DPA) in mouse brain<sup>36</sup>.  
221 However, these voltage sensors requires PA imaging at the visible spectral range (488 nm and 530  
222 nm for GCaMP5G; 550 nm for CaSPA; 500 nm and 570 nm for DPA), which are suboptimal when  
223 imaging deep brain such as hippocampus positioned at 5 mm – 8 mm depth including intact scalp and  
224 cortex in rat<sup>22,37</sup>.

225 Recently, we proposed transcranial fPA recordings of brain activity *in vivo* with a near-  
226 infrared VSD, delivered through the blood-brain barrier (BBB) via pharmacological modulation, as a  
227 promising tool to transcend optical neuroimaging limitations, particularly as it relates to sensing  
228 depth<sup>19,23,38</sup>. The studies demonstrated that transcranial fPA neuroimaging distinguishes *in vivo*  
229 seizure activity in stimulated rat brains from that of control groups in real time. However, the results  
230 were limited by the use of a global chemo-convulsant, causing perturbation across the entire brain  
231 caused by the intraperitoneal administration of penetylenetetrazole (PTZ). In this paper, we presented  
232 follow-on advances in fPA VSD neuroimaging by focal neural stimulation of heterogeneous neural  
233 circuits, with concomitant validations from qEEG and glutamate quantification using microdialysis,  
234 respectively. The set of experiments described here yield key findings as follows: (1) The  
235 microdialysis-dependent low- and high-dose NMDA infusion into the central nervous system (CNS)  
236 lead to a wide range of focal extracellular glutamate concentration increase in hippocampus up to

237 ~800 %. (2) The neurochemical response (microdialysis) was well-correlated to the phenotypes in the  
238 electrophysiological sensing (qEEG). The NMDA activation in the hippocampus triggers an all-or-  
239 none type of circuit dynamics that lead to the initiation of a focal seizure in the hippocampal circuit.  
240 (3) Transcranial fPA neuroimaging data successfully identified hot spots of focal NMDA receptor  
241 activation, as presented in the qEEG recordings. The hippocampal circuitry provided the proportional  
242 excitation of glutamatergic neurotransmission with concomitant NMDA infusion. The DG of the  
243 hippocampus is positioned as a gatekeeper to regulate the vast excitatory cortical inputs from  
244 propagating into the hippocampus<sup>1</sup>. Characteristically, the DG displays a high activation threshold; a  
245 trait that is mediated by its profuse innervation by inhibitory GABAergic neurons and relatively  
246 hyperpolarized resting membrane potential of its pyramidal neurons<sup>39</sup>. In epilepsy the DG fails to  
247 gate the propagation of excitatory inputs into the hippocampus, resulting in overexcitation and  
248 seizures. In naïve animals, *in vivo* optogenetic activation of the DG disrupts its gating function and  
249 induces seizures that increase in severity depending on the duration of the stimulus<sup>1</sup>. In this study,  
250 the disruption of DG gating by strong stimuli has been clearly demonstrated by utilizing the fPA  
251 VSD neuroimaging techniques during focal NMDA infusion.

252 Further investigations are required to advance our current perspectives available with tri-  
253 modal sensing, including fPA, qEEG, and microdialysis. Glutamate produces fast-rising brief  
254 depolarizations in pyramidal neurons. Therefore, the use of fPA neuroimaging will enable us to more  
255 precisely assess glutamate and GABA dynamics in order to formulate a more complete profile of  
256 circuit activation. Once homeostasis is disrupted, neuronal activity is sensitive to changes both of  
257 excitatory and inhibitory mechanisms. Faster neurochemical recording is another approach that may  
258 prove useful in assessing the impact of these measures. Although microdialysis successfully  
259 provided quantitative, focal neurochemical concentrations, the sampling rate of 1 sample per 20 min  
260 was slow. Techniques offering faster temporal resolution may allow more meaningful comparison of  
261 the neurochemical changes yielded by microdialysis and the electrophysiological events monitored  
262 by qEEG and fPA neuroimaging<sup>40</sup>. One such technique, using custom built hardware and the  
263 Amplex Red method, achieved fluorescence-based quantification of glutamate from samples taken  
264 every 5 seconds, though reliability appeared to be limited when higher glutamate concentrations were  
265 measured<sup>41</sup>. Implantable glutamate biosensors allow sub-second readouts of neurochemical  
266 concentrations. However, current limitations include sensitivity, selectivity, and high cost; recent  
267 developments in materials, effective modeling, and sensor design may soon alleviate some of these  
268 limitations<sup>42,43</sup>.

269 From the results, transcranial fPA neuroimaging was able to differentiate the circuit activity  
270 defined with qEEG and microdialysis. However, future developments should serve to further advance  
271 the efficacy of the fPA neuroimaging in neuroscience. (1) We expect that improved signal processing  
272 for extracting neural activity from the ubiquitous blood context will enable better characterization of  
273 brain function. The present *in vivo* experiments confirmed the possibility of background suppression,  
274 as also presented in our previous study<sup>19</sup>. Enhanced signal processing and/or use of multi-spectral  
275 wavelengths may allow significantly improved spectral differentiation of electrophysiological  
276 activities in the brain at higher temporal resolution, leading to development of novel quantitative  
277 metrics for real-time brain activity measures. Having isotropic resolution with 2-D PA probes would  
278 be also an interesting direction to pursue as a follow up to the present work. The use of 2-D PA probe  
279 would not only allow real-time volumetric information, but also enable the suppression of off-axis  
280 interference. Even though we presented that neural activity can be successfully discerned with our  
281 current 1-D PA probe, its sensitivity might be affected by off-axis interferences especially from the  
282 elevation direction because of the limited acoustic lens focusing at a fixed depth. The neuroimaging  
283 using 2-D PA probe would reject those interferences by the advanced electrical beamforming

284 capability in axial, lateral, and elevation directions. Having an improved PA imaging system would  
285 provide significant breakthrough in terms of spatiotemporal resolution in fPA neuroimaging. Even  
286 though our current laser system yields both 4 fps (frame-per-second) of temporal resolution and PA  
287 signal sensitivity at rat hippocampus, further optimization of temporal resolution would provide finer  
288 spatiotemporal specificity. On the other hand, we consider employing larger animal model for this  
289 fPA VSD neuroimaging research. Pig models have been an ideal subject to pave the way to human  
290 translation of neuroengineering technologies, thanks to their analogous brain structure and  
291 physiology and scalp and skull thicknesses to those in humans, with alleviated ethical issues<sup>44</sup>. We  
292 already validated the transcranial fPA neuroimaging in the pig model, and will continue to pursue  
293 this research direction<sup>45</sup>.

294 In all, the transcranial fPA neuroimaging at hippocampus in *in vivo* rat brain was successfully  
295 correlated with electrophysiologic and neurochemical measurements using qEEG and microdialysis:  
296 focal NMDA infusion triggers glutamate release that excites the neural circuit, and at threshold doses  
297 it causes runaway excitation in the hippocampus by overcoming DG gating. This is reflected in the  
298 lower seizure threshold of the hippocampus. Therefore, the transcranial fPA neuroimaging is a  
299 promising technology for the visualization of focal neural events in real time.

300

## 301 **Material and Methods**

302 **Animal preparation.** For the proposed *in vivo* experiments, 8-9-week-old male Sprague Dawley rats  
303 (Charles Rivers Laboratory, Inc., MA, United States) weighing 275-390g were used. The use of  
304 animals for the proposed experimental protocol was approved by the Institutional Animal Care and  
305 Use Committee of Johns Hopkins Medical Institute (RA16M225). Rats were housed in groups of 3  
306 per cage with free access to food and water and maintained on a 12hr light / 12hr dark cycle.

307 On the day of the study the rats were weighed and anesthetized with urethane (1.2mg/kg.).  
308 Urethane was given incrementally with alternating intra-peritoneal (ip) and subcutaneous (sc) dosing.  
309 Three (3) ml of isotonic saline was given sc on each side of the body to keep the animal hydrated  
310 during the experimental procedure. Body temperature was maintained until animal was fully  
311 anesthetized and ready for surgery. For fPA and qEEG studies, an iv catheter was inserted into a tail  
312 vein prior to surgery for dye administration during the studies. Once a stable plane of anesthesia was  
313 established, hair was shaved from the scalp of each rat to have acoustic coupling for transcranial fPA  
314 recording. The rat was placed into a stereotaxic device (Stoeling Co. Wood Dale, IL). This fixation  
315 procedure was required to prevent any unpredictable movement during fPA or EEG recording of  
316 neural activities. A CMA12 microdialysis probe (Harvard Apparatus, Holliston, MA, USA) was  
317 implanted into the CA<sub>3</sub> region of the right hippocampus (stereotaxic coordinates: 3 mm lateral and  
318 3.8 mm posterior to bregma, and 3.6 mm below the surface of the dura, Figure 3a)<sup>22</sup>. The probe  
319 active exchange surface was 2 × 0.5 mm. The probe was secured to the skull using dental acrylic  
320 cement. The fPA and qEEG probes were placed on the contralateral side of the microdialysis probe.

321 **Fluorescence quenching-based near-infrared voltage-sensitive dye.** In the present *in vivo* study,  
322 we used the fluorescence quenching-based near-infrared cyanine VSD, IR780 perchlorate (576409,  
323 Sigma-Aldrich Co. LLC, MO, United States) as used in our previous *in vivo* study differentiating a  
324 chemo-convulsant seizure activity<sup>19</sup>, and it has the analogous chemical structure of PAVSD800-2,  
325 our new VSD validated in our previous *in vitro* study<sup>38</sup>. This VSD yields fluorescence quenching  
326 and de-quenching depending on membrane polarization and subsequent change in the local VSD



327 molecule density, leading to a reciprocal change of PA contrast with non-radiative relaxation of  
328 absorbed energy.

329 **Functional fPA neuroimaging.** We used real-time PA data acquisition to record  
330 electrophysiological neural activities *in vivo* as in our previous study<sup>19</sup>: an ultrasound research  
331 system consisted of an ultrasound linear array transducer connected to a real-time data acquisition  
332 system (SonixDAQ, Ultrasonix Medical Corp., Canada). To induce the PA signals, pulsed laser light  
333 generated by a second-harmonic (532 nm) Nd:YAG laser pumping an optical parametric oscillator  
334 (OPO) system (Phocus Inline, Opotek Inc., USA) provided 690-900 nm of tunable wavelength range  
335 and 20 Hz of the maximum pulse repetition frequency. A bifurcated fiber optic bundle, each 40 mm  
336 long and 0.88 mm wide, was used for laser pulse delivery. The PA probe was situated between the  
337 outlets of the bifurcated fiber optic bundles using a customized, 3-D printed shell for evenly  
338 distributing laser energy density in the imaging field-of-view. The alignment of outlets was focused  
339 specifically at 20 mm depth. The PA probe was positioned in the contralateral sagittal plane of  
340 microdialysis probe (3 mm) to cover the hippocampal cross-section. The distance between the PA  
341 probe and the rat skin surface was 20 mm filled with acoustic gel, and the resultant energy density  
342 was at  $\sim 3.5$  mJ/cm<sup>2</sup>, which is far below the maximum permissible exposure (MPE) of skin to laser  
343 radiation by the ANSI safety standards<sup>46</sup>. A wavelength of 790 nm was used, at which sufficient  
344 absorbance can be obtained by the near-infrared VSD, i.e., IR780 perchlorate. Also, excitation at that  
345 wavelength prevented the undesired time-variant change of blood oxygen saturation, since the  
346 wavelength corresponds to the isosbestic point of Hb and HbO<sub>2</sub> absorption spectra. Detailed  
347 information of neural activity reconstruction using normalized time-frequency analysis can be found  
348 in our previous publication<sup>19</sup>.

349 ***In vivo* microdialysis.** *In vivo* microdialysis sampling was carried out as previously described<sup>47,48</sup>.  
350 For infusion experiments, NMDA (Sigma-Aldrich Chemicals, St. Louis, Mo) was weighed,  
351 solubilized, and diluted to the desired concentration in artificial cerebrospinal fluid (NaCl, 147  
352 mmol/L; KCl, 2.7 mmol/L; CaCl<sub>2</sub>, 1.2 mmol/L; MgCl<sub>2</sub>, 0.85 mmol/L) (Harvard Apparatus, Holliston,  
353 MA, USA) on the study day. Once the probe was inserted and secured, it was perfused with artificial  
354 cerebrospinal fluid pumped at a flow rate of 2  $\mu$ l/min. Samples were collected at 20 min intervals,  
355 and immediately transferred to a -80°C freezer until assayed. To allow sufficient time for the  
356 glutamate levels to equilibrate, three baseline samples were collected an hour following initiation of  
357 infusion. Following these samples, NMDA was infused into the brain directly through the dialysis  
358 probe with the same pump parameters as used for the baseline samples. Dialysate samples were  
359 assayed for glutamate by a two-step process using HPLC-ECD on an Eicom HTEC-500 system  
360 (EICOM, San Diego, CA, USA). After passing the samples through a separation column, they were  
361 processed via a column containing immobilized L-glutamate oxidase enzyme, resulting in the release  
362 of hydrogen peroxide. The hydrogen peroxide concentration was then determined using a platinum  
363 working electrode. Chromatographic data were acquired online and exported to an Envision software  
364 system (EICOM, San Diego, CA, USA) for peak amplification, integration, and analysis.

365 **Quantitative EEG.** All EEG recordings utilized a three-electrode paradigm: 1 recording, 1 reference  
366 (aligned to the site of activation) and 1 ground over the rostrum. The electrodes (IVES EEG; Model #  
367 SWE-L25 – IVES EEG solutions, MA, USA) were fixed with minimal cyanoacrylate adhesive  
368 (KrazyGlue), similar to previous protocols<sup>49</sup>. Data acquisition was performed using Sirenia software  
369 (Pinnacle Technologies Inc., Kansas, USA) with synchronous video capture. Data acquisition had a  
370 14-bit resolution, 400 Hz sampling rate, and a band pass filter between 0.5 Hz and 50 Hz. The  
371 acquisition files were stored in an .EDF format and scored manually, using real-time annotations

372 from the experiments. EEG power for 2-second epochs was done using an automated fast Fourier  
373 transformation module in Sirenia software <sup>50</sup>.

374 ***In vivo* experimental protocol.** The *in vivo* protocols were designed for simultaneous multi-modal  
375 sensing of the neural activity at hippocampus: microdialysis-qEEG and microdialysis-fPA  
376 neuroimaging. Figure 2 shows a detailed schematic protocol for each group representing the response  
377 to the administration of NMDA, Lexiscan and VSD (i.e., IR780 perchlorate). fPA and qEEG data  
378 acquisition were performed for 40 min to correlate with three microdialysis samples collected at 20-  
379 min intervals. Graded NMDA infusion concentrations were applied to identify the dose-dependent  
380 glutamatergic excitation of hippocampal circuit: 0.3 mM ( $n = 3$ ) and 3.0 mM ( $n = 6$ ). VSD and  
381 Lexiscan followed the data acquisition sequence with 3-min delay, thereby 5 min of baseline phase  
382 was guaranteed for the VSD response reconstruction in fPA neuroimaging before starting NMDA  
383 infusion. The dosing protocol for Lexiscan and VSD administration was as follows: through an iv tail  
384 vein catheter, 150  $\mu$ l of Lexiscan (0.4mg/5ml) was injected, followed by 200  $\mu$ l of VSD at 2 mg/ml  
385 concentration, flushed immediately with 150  $\mu$ l of 0.9% isotonic saline. The EEG signal was  
386 recorded an identical preparation procedure as the fPA neuroimaging, including animal preparation  
387 and administration of IR780, Lexiscan and experimental duration time for all recordings.

388 **Brain histology.** Rats used for the above protocol were sacrificed, and whole brains immediately  
389 harvested and placed in 10 % formalin. All brains were allowed to fix in fresh 10 % formalin for at  
390 least 48 hours with gentle agitation on a conical rotator. Subsequently, the brains were processed  
391 through a series of sucrose gradients (15 %, 20 %, 30 % for 12-24 hours each) for cryoprotection.  
392 Brains were sectioned frozen at 300  $\mu$ m thickness. Tissue sections were mounted on slides in  
393 ProLong Diamond Anti-face mountant. Slides with sections were imaged using an Olympus OM-D  
394 E-M5 Mark II for bright field image and using LI-COR Odyssey for fluorescence visualization.

395

## 396 **Author Contributions**

397 DFW, AAG and MB originally conceived of the NMDA administration and of microdialysis with PA  
398 idea and helped to design the overall research plan with initial funding for the *in vivo* experiments.  
399 DFW critically revised the focus of the results and final version and interpretation. EMB, LML, and  
400 SDK helped to design the overall research plan, helped plan specific experiments and all contributed  
401 to the review and writing of the manuscript. Jeeun K, SDK, JSE, BJS, HV planned and carried out *in*  
402 *vivo* experiments, analyzed the research outcomes, and wrote key elements of the first draft of the  
403 manuscript. Jeeun K analyzed and interpreted the PA measurements and completed the first  
404 manuscript, HV and JE the NMDA dosing and microdialysis, and SDK and BS the EEG  
405 experiments. MB provided resources and personnel and vital collaboration for the microdialysis part  
406 of the experiment. HV and LML devised the VSD vehicle preparation. APM performed  
407 histopathological analysis. MMH planned and supervised confirmation of VSD penetration into brain  
408 tissue also contributed to the final version of the manuscript. AAG critically revised experimental  
409 design, draft, and final versions of manuscript, and interpretation of results. Jin K developed, funded,  
410 and participated in the current PA system design. AR participated in early planning and critically  
411 read and edited the manuscript. He has contributed both technically and materially to support this  
412 research. EMB led the development, system specification, design specification, and funding of the  
413 current PA imaging system. Secured the funding of the needed imaging experiments throughout the  
414 lifetime of the project, including taking responsibility of 2 full-time research members specifically  
415 for this work, Jeeun K and APM. Further, he has contributed intellectually by mentoring these  
416 members and providing input on manuscripts, and participating on PI meetings.

417

## 418 **Funding**

419 This work was supported by the NIH BRAIN Initiative under Grant No. R24 MH106083-03 (DFW,  
420 AR, AAG, EMB, HV, JE) and the NIH National Institute of Biomedical Imaging and Bioengineering  
421 under Grant No. R01EB01963 (LML); NIH National Institute of Child Health and Human  
422 Development (NICHD) for R01HD090884 (SDK); NIH National Institute of Heart, Lung and Blood  
423 (NHLBI) under grant number R01HL139543 (Jeeun K, APM, EMB); National Cancer Institute  
424 (NCI) under grant number R21CA202199 and its equipment supplement (EMB). Funding of the PA  
425 equipment was provided via resources of Jin K and EMB NSF Career award #1653322. Jeeun K was  
426 partially supported by the Basic Science Research Program through the National Research  
427 Foundation of Korea (NRF) funded by the Ministry of Education #2018R1A6A3A03011551.

428

## 429 **Conflict of Interest Statement**

430 The subject matter described in this article is included in patent applications filed by the University  
431 of Connecticut and Johns Hopkins University. LML is a founder and owner of Potentiometric Probes  
432 LLC, which sells voltage sensitive dyes.

433 The remaining authors declare that the research was conducted in the absence of any commercial or  
434 financial relationships that could be construed as a potential conflict of interest.

435 **Figures**

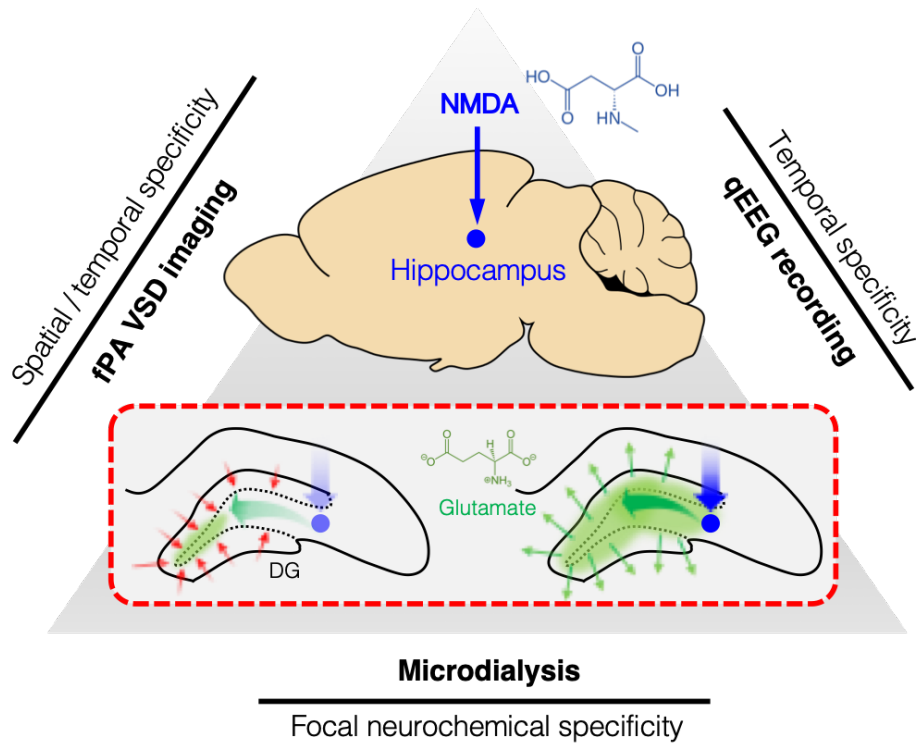

436

437 **Figure 1 Tri-modal sensing of rat hippocampus.** Red dotted rectangular describes dentate gyrus (DG)  
438 gating breakdown at hippocampus to a focal NMDA infusion. NMDA, N-methyl-d-aspartate; VSD, voltage-  
439 sensitive dye.

440

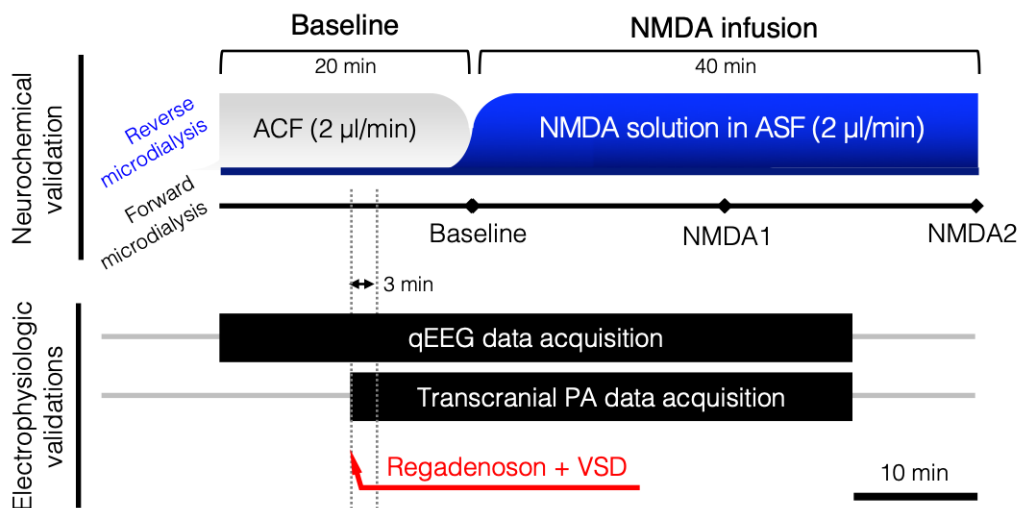

441

442 **Figure 2 In vivo experimental protocol.** Tri-modal monitoring of rat hippocampus using reverse/forward  
443 microdialysis, transcranial PA imaging, and qEEG. ACF, artificial cerebrospinal fluid.

444

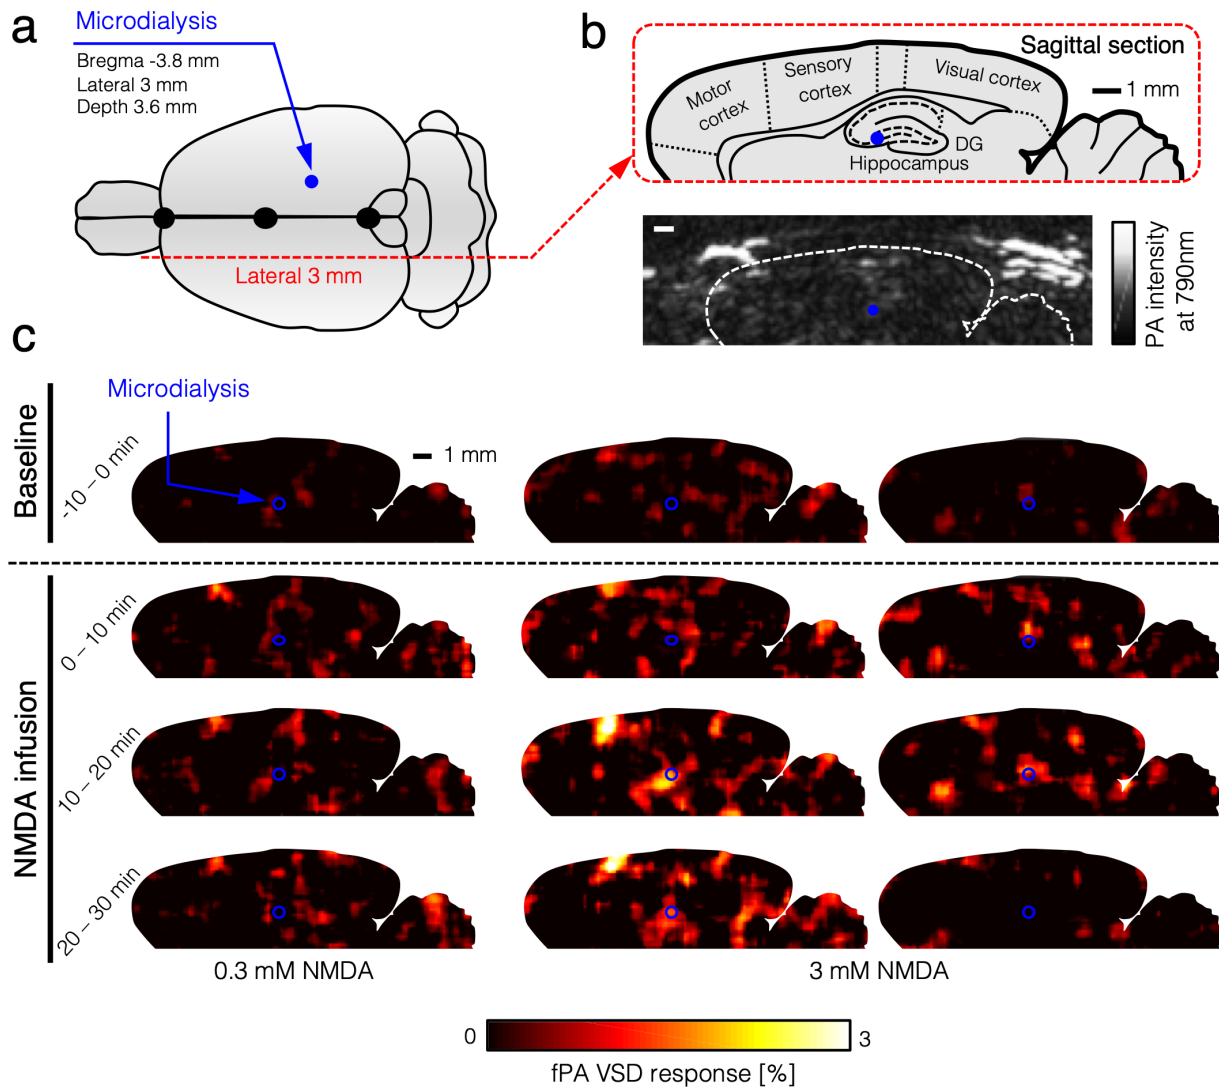

445

446 **Figure 3. Transcranial PA neuroimaging of the hippocampal circuit dynamics following focal NMDA**  
447 **infusion.** (a) Illustration of stereotaxic coordinates for the microdialysis probe and sagittal cross-sections for  
448 real-time PA recording. (b) The sagittal PA imaging plane was selected in the contralateral side of the  
449 microdialysis probe infusing NMDA into the brain (3 mm lateral). (c) Time-averaged VSD response maps  
450 during -10 – 0 min (baseline phase); 0 – 10 min, 10 – 20 min, and 20-30 min (NMDA infusion phases). Note  
451 that the blue points indicate microdialysis probe in contra-lateral positions. Maximal glutamate concentration  
452 increases for representative fPA images were 34.23 % (left), 734.48 % (center) and 493.91 % (right).

453

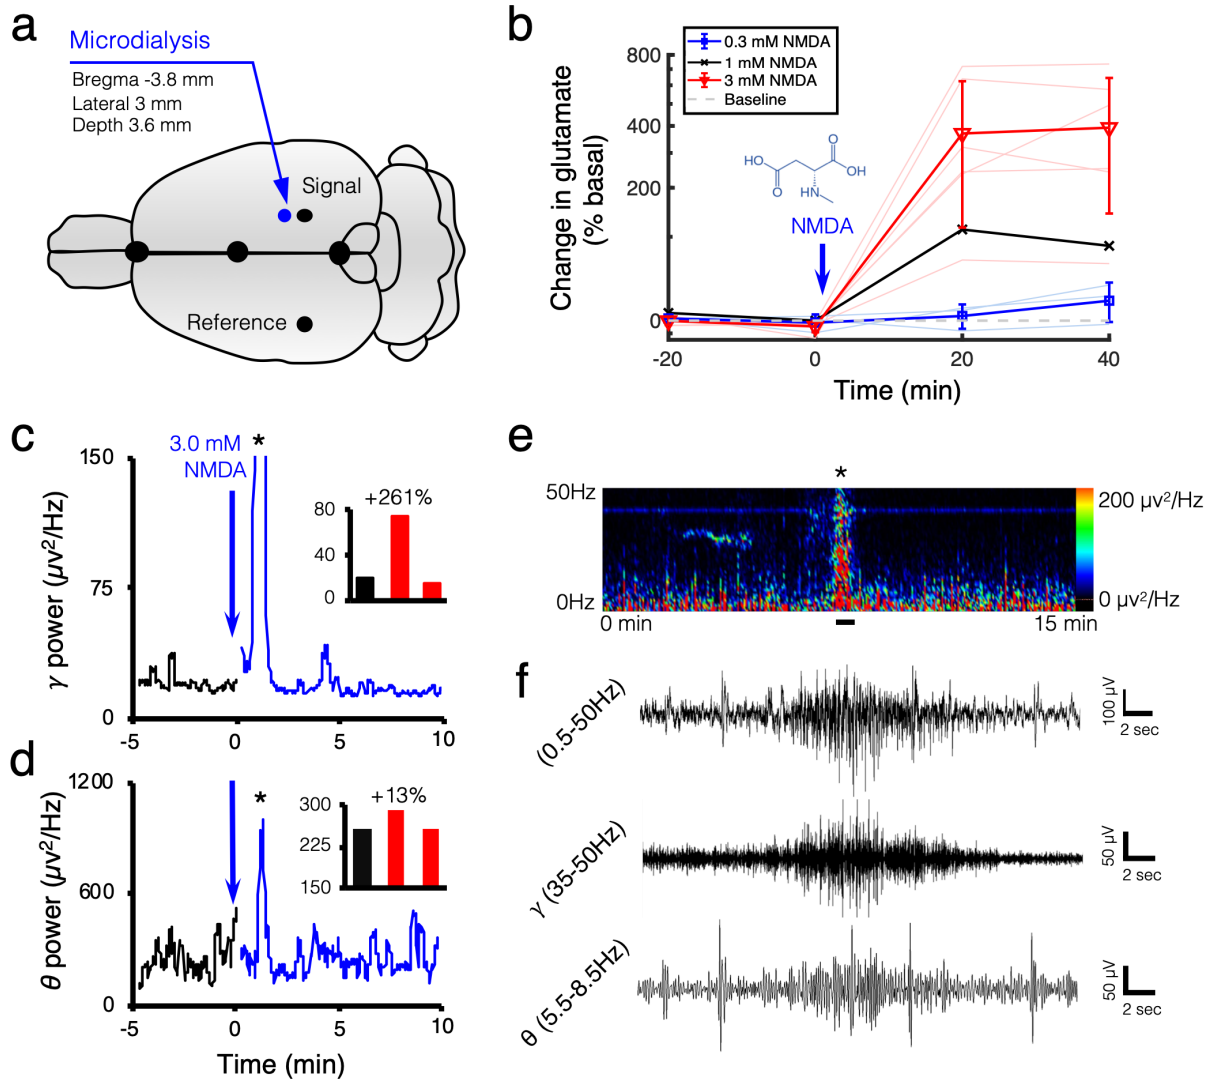

454

455 **Figure 4. Extracellular glutamate concentration and concomitant electrophysiology during NMDA-**  
 456 **evoked activity in the hippocampus.** (a) Illustrates stereotaxic coordinates for the microdialysis probe and  
 457 recording leads. Ground electrode was implanted over the rostrum. (b) 0.3 ( $n = 3$ ), 1.0 ( $n = 1$ ), and 3.0 mM ( $n$   
 458 = 6) NMDA infusion into the hippocampus caused maximal glutamate increases of  $17.93 \pm 19.05\%$ ,  $112.42\%$ ,  
 459 and  $392.99 \pm 250.54\%$  respectively as compared to % baseline. Gray dotted line indicates the baseline. (c)  
 460 Gamma (35-50Hz) power shows a 5-min baseline recording (black trace), followed by two consecutive 5 min  
 461 traces (blue trace) following focal NMDA infusion in the hippocampus. EEG demonstrated a 261% increase  
 462 in gamma power, as compared to % baseline, and an onset of epileptiform discharges after focal NMDA  
 463 infusion (see inset bar graph; asterisk denotes epileptiform activity). (d) Respective theta power after NMDA  
 464 infusion represents the theta component of the focal seizure. (e) 15-min spectral power heat map demonstrates  
 465 the spectral power changes associated with NMDA infusion and subsequent epileptiform activity (denoted by  
 466 black asterisk in e). (f) The representative raw EEG trace during the occurrence of the epileptiform event  
 467 (solid black line in e) for full (0.5-50Hz), gamma (0.5-50Hz), and theta (5.5-8.5Hz) power; respectively. For  
 468 the expanded time scale of the focal hippocampal seizure see Supplemental 1.

469

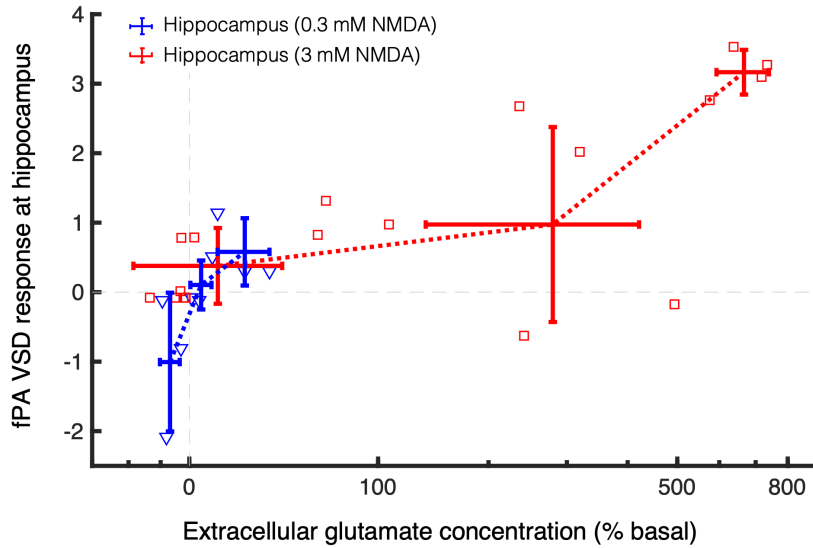

470

471 **Figure 5. fPA VSD response at hippocampus as a function of extracellular glutamate concentration**  
472 **change.** Grey dotted lines indicate the basal level in fPA VSD response and extracellular glutamate  
473 concentration.

474

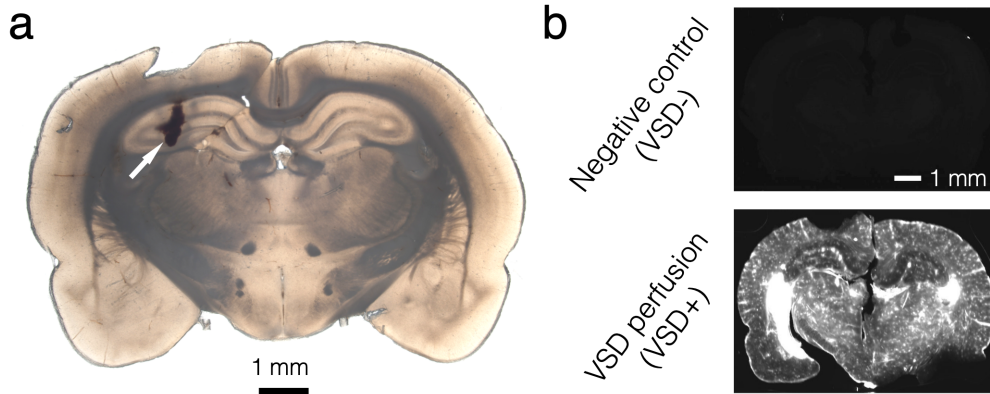

475

476 **Figure 6. Histopathological confirmation (a)** Microdialysis probe at hippocampus. White arrow indicates the  
477 wound caused by microdialysis probe installation. **(b)** Frozen-sectioning histopathological confirmation of  
478 systematic VSD delivery throughout brain tissue region.

479

480 **Supplementary Material**

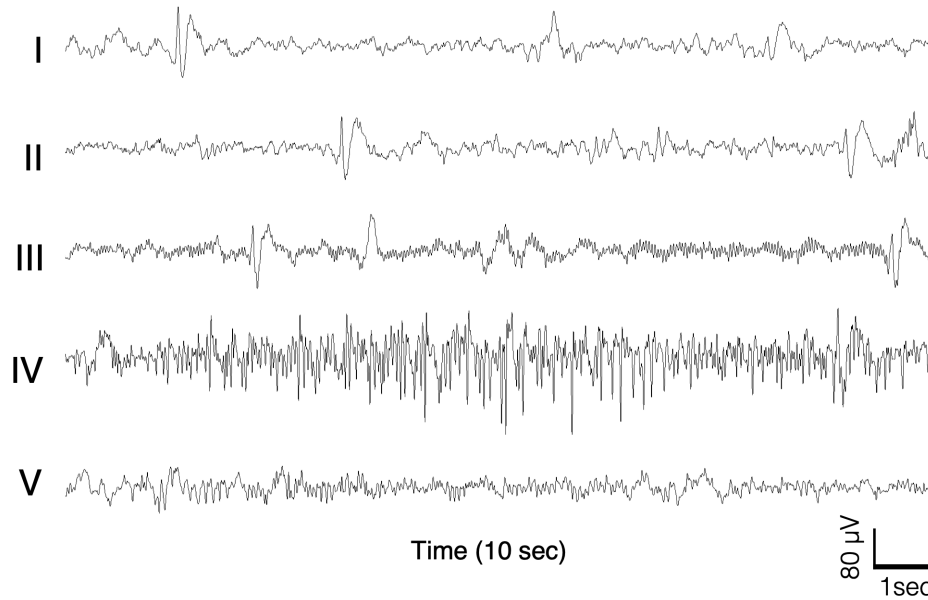

482 **Figure S1. Expanded time scale of EEG recording during NMDA infusion into the hippocampus.** (a) 10  
483 sec expanded time scale of raw EEG traces during hippocampal NMDA infusion. (I) Baseline (II) immediately  
484 after onset of NMDA infusion (III) immediately before ictal event (IV) during focal seizure event (V) and  
485 sustained short duration high frequency hippocampal discharges after the focal seizure event.

486

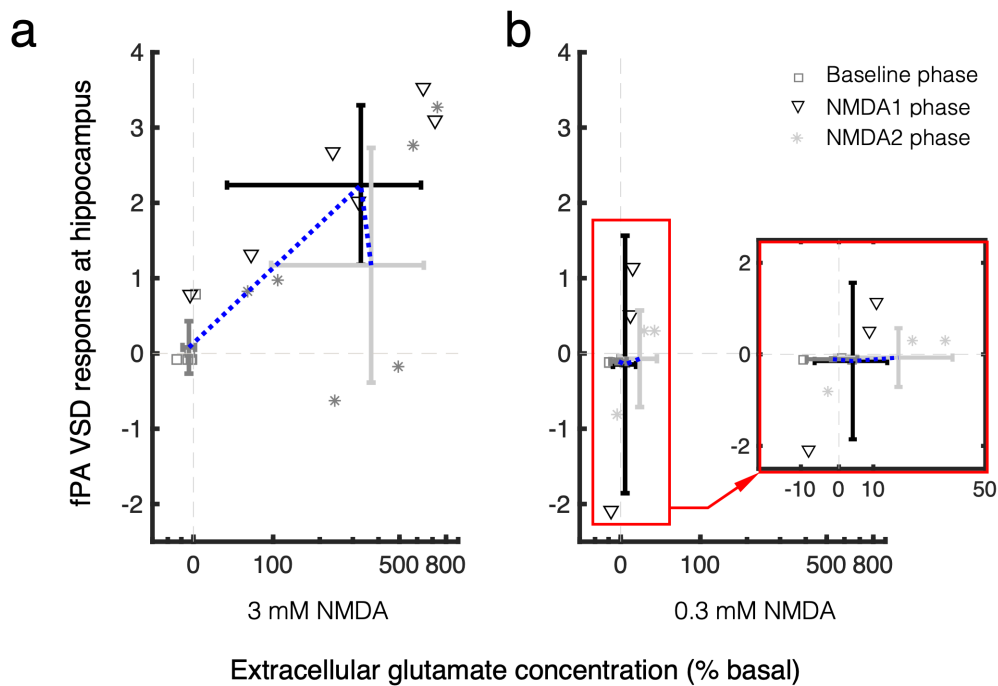



488 **Figure S2. fPA VSD responses in baseline, NMDA1, and NMDA2 phases as a function of extracellular**  
489 **glutamate concentration change at hippocampus. (a) 3.0 mM NMDA infusion. (b) 0.3 mM NMDA**  
490 **infusion. 0.3 mM NMDA data in red rectangular is magnified and presented together (see inset graph). Grey**  
491 **dotted lines indicate the basal level in fPA VSD response and extracellular glutamate concentration.**

## 492 **References**

- 493 1 Magnuson EK, Armstrong C, Bui A, Lew S, Oijala M, Soltesz I. In vivo evaluation of the  
494 dentate gate theory in epilepsy. *The Journal of Physiology* 2015; **593**: 2379–2388.
- 495 2 Derdikman D, Hildesheim R, Ahissar E, Arieli A, Grinvald A. Imaging spatiotemporal  
496 dynamics of surround inhibition in the barrels somatosensory cortex. *J Neurosci* 2003; **23**:  
497 3100–3105.
- 498 3 Petersen CCH, Grinvald A, Sakmann B. Spatiotemporal Dynamics of Sensory Responses in  
499 Layer 2/3 of Rat Barrel Cortex Measured In Vivo by Voltage-Sensitive Dye Imaging Combined  
500 with Whole-Cell Voltage Recordings and Neuron Reconstructions. *Journal of Neuroscience*  
501 2003; **23**: 1298–1309.
- 502 4 Petersen CC, Sakmann B. Functionally independent columns of rat somatosensory barrel cortex  
503 revealed with voltage-sensitive dye imaging. *J Neurosci* 2001; **21**: 8435–8446.
- 504 5 Okubo Y, Sekiya H, Namiki S, Sakamoto H, Iinuma S, Yamasaki M *et al.* Imaging  
505 extrasynaptic glutamate dynamics in the brain. *Proceedings of the National Academy of*  
506 *Sciences* 2010; **107**: 6526–6531.
- 507 6 Crescenzi R, DeBrosse C, Nanga RPR, Byrne MD, Krishnamoorthy G, D'Aquila K *et al.*  
508 Longitudinal imaging reveals subhippocampal dynamics in glutamate levels associated with  
509 histopathologic events in a mouse model of tauopathy and healthy mice. *Hippocampus* 2017;  
510 **27**: 285–302.
- 511 7 Voets NL, Hodgetts CJ, Sen A, Adcock JE, Emir U. Hippocampal MRS and subfield volumetry  
512 at 7T detects dysfunction not specific to seizure focus. *Sci Rep* 2017; **7**: 1–14.
- 513 8 Kondo M, Kobayashi K, Ohkura M, Nakai J, Matsuzaki M. Two-photon calcium imaging of the  
514 medial prefrontal cortex and hippocampus without cortical invasion. *Elife* 2017; **6**: 592.
- 515 9 Wang LV, Hu S. Photoacoustic tomography: in vivo imaging from organelles to organs. *Science*  
516 2012; **335**: 1458–1462.
- 517 10 Wang X, Pang Y, Ku G, Xie X, Stoica G, Wang LV. Noninvasive laser-induced photoacoustic  
518 tomography for structural and functional in vivo imaging of the brain. *Nat Biotechnol* 2003; **21**:  
519 803–806.
- 520 11 Zhang HF, Maslov K, Stoica G, Wang LV. Functional photoacoustic microscopy for high-  
521 resolution and noninvasive in vivo imaging. *Nat Biotechnol* 2006; **24**: 848–851.
- 522 12 Kang J, Kim E-K, Kim GR, Yoon C, Song T-K, Chang JH. Photoacoustic imaging of breast  
523 microcalcifications: a validation study with 3-dimensional ex vivo data and spectrophotometric  
524 measurement. *J Biophoton* 2015; **8**: 71–80.
- 525 13 Kang J, Chung WY, Kang S-W, Kwon HJ, Yoo J, Kim E-K *et al.* Ex Vivo Estimation of  
526 Photoacoustic Imaging for Detecting Thyroid Microcalcifications. *PLoS ONE* 2014; **9**.  
527 doi:10.1371/journal.pone.0113358.

- 528 14 Kim GR, Kang J, Kwak JY, Chang JH, Kim SI, Youk JH *et al.* Photoacoustic imaging of breast  
529 microcalcifications: a preliminary study with 8-gauge core-biopsied breast specimens. *PLoS*  
530 *ONE* 2014; **9**: e105878.
- 531 15 Yao J, Maslov KI, Wang LV. In vivo Photoacoustic Tomography of Total Blood Flow and  
532 Potential Imaging of Cancer Angiogenesis and Hypermetabolism. *Technol Cancer Res Treat*  
533 2012; **11**: 301–307.
- 534 16 Hu S. Listening to the Brain With Photoacoustics. *IEEE J Select Topics Quantum Electron*  
535 2016; **22**: 117–126.
- 536 17 Hui J, Cao Y, Zhang Y, Kole A, Wang P, Yu G *et al.* Real-time intravascular photoacoustic-  
537 ultrasound imaging of lipid-laden plaque in human coronary artery at 16 frames per second. *Sci*  
538 *Rep* 2017; **7**: 1417.
- 539 18 Wu M, Springeling G, Lovrak M, Mastik F, Iskander-Rizk S, Wang T *et al.* Real-time  
540 volumetric lipid imaging in vivo by intravascular photoacoustics at 20 frames per second.  
541 *Biomed Opt Express* 2017; **8**: 943–953.
- 542 19 Kang J, Zhang HK, Kadam SD, Fedorko J, Valentine H, Malla AP *et al.* Transcranial Recording  
543 of Electrophysiological Neural Activity in the Rodent Brain in vivo Using Functional  
544 Photoacoustic Imaging of Near-Infrared Voltage-Sensitive Dye. *Frontiers in Neuroscience*  
545 2019; **13**: 1–14.
- 546 20 Andrade-Valenca LP, Dubeau F, Mari F, Neurology RZ, 2011. Interictal scalp fast oscillations  
547 as a marker of the seizure onset zone. *Neurology* 2011; **77**: 524–531.
- 548 21 Foldvary N, Klem G, Hammel J, Bingaman W, Najm I, Lüders H. The localizing value of ictal  
549 EEG in focal epilepsy. *Neurology* 2001; **57**: 2022–2028.
- 550 22 Paxinos G, Watson C. *The Rat Brain in Stereotaxic Coordinates*. Seventh edition. Elsevier  
551 Academic Press, 2014.
- 552 23 Pak RW, Kang J, Valentine H, Loew LM, Thorek DL, Boctor EM *et al.* Voltage-sensitive dye  
553 delivery through the blood brain barrier using adenosine receptor agonist Regadenoson. *Biomed*  
554 *Opt Express* 2018; **9**: 3915–3922.
- 555 24 Nie L, Cai X, Maslov K, Garcia-Urbe A, Anastasio MA, Wang LV. Photoacoustic tomography  
556 through a whole adult human skull with a photon recycler. *J Biomed Opt* 2012; **17**: 110506.
- 557 25 Li W, Chen R, Lv J, Wang H, Liu Y, Peng Y *et al.* In Vivo Photoacoustic Imaging of Brain  
558 Injury and Rehabilitation by High-Efficient Near-Infrared Dye Labeled Mesenchymal Stem  
559 Cells with Enhanced Brain Barrier Permeability. *Adv Sci (Weinh)* 2018; **5**: 1700277–11.
- 560 26 Liu Y, Yang Y, Sun M, Cui M, Fu Y, Lin Y *et al.* Highly specific noninvasive photoacoustic  
561 and positron emission tomography of brain plaque with functionalized croconium dye labeled  
562 by a radiotracer. *Chem Sci* 2017; **8**: 2710–2716.
- 563 27 Hu S, Wang LV. Neurovascular photoacoustic tomography. *Front Neuroenergetics* 2010; **2**: 10.

- 564 28 Zhang P, Li L, Lin L, Hu P, Shi J, He Y *et al.* High-resolution deep functional imaging of the  
565 whole mouse brain by photoacoustic computed tomography in vivo. *J Biophoton* 2018; **11**:  
566 e201700024–6.
- 567 29 Luke GP, Yeager D, Emelianov SY. Biomedical Applications of Photoacoustic Imaging with  
568 Exogenous Contrast Agents. *Ann Biomed Eng* 2011; **40**: 422–437.
- 569 30 Weber J, Beard PC, Bohndiek SE. Contrast agents for molecular photoacoustic imaging. *Nat*  
570 *Meth* 2016; **13**: 639–650.
- 571 31 Huynh E, Jin CS, Wilson BC, Zheng G. Aggregate enhanced trimodal porphyrin shell  
572 microbubbles for ultrasound, photoacoustic, and fluorescence imaging. *Bioconjugate Chem*  
573 2014; **25**: 796–801.
- 574 32 Ju K-Y, Kang J, Pyo J, Lim J, Chang JH, Lee J-K. pH-Induced aggregated melanin  
575 nanoparticles for photoacoustic signal amplification. *Nanoscale* 2016; **8**: 14448–14456.
- 576 33 Moon H, Kang J, Sim C, Kim J, Lee H, Chang JH *et al.* Multifunctional theranostic contrast  
577 agent for photoacoustics- and ultrasound-based tumor diagnosis and ultrasound-stimulated local  
578 tumor therapy. *Journal of Controlled Release* 2015; **218**: 63–71.
- 579 34 Deán-Ben XL, Sela G, Lauri A, Kneipp M, Ntziachristos V, Westmeyer GG *et al.* Functional  
580 optoacoustic neuro-tomography for scalable whole-brain monitoring of calcium indicators. *Light*  
581 *Sci Appl* 2016; **5**: e16201–7.
- 582 35 Roberts S, Seeger M, Jiang Y, Mishra A, Sigmund F, Stelzl A *et al.* Calcium Sensor for  
583 Photoacoustic Imaging. *J Am Chem Soc* 2018; **140**: 2718–2721.
- 584 36 Ruo B, Zhang R, Li L, Shao J-Y, Wang LV. Photoacoustic imaging of voltage responses beyond  
585 the optical diffusion limit. *Sci Rep* 2017; **7**: 2560.
- 586 37 Nowak K, Mix E, Gimsa J, Strauss U, Sriperumbudur KK, Benecke R *et al.* Optimizing a  
587 Rodent Model of Parkinson's Disease for Exploring the Effects and Mechanisms of Deep Brain  
588 Stimulation. *Parkinson's Disease* 2011; **2011**: 1–19.
- 589 38 Zhang HK, Yan P, Kang J, Abou DS, Le HND, Jha AK *et al.* Listening to membrane potential:  
590 photoacoustic voltage-sensitive dye recording. *J Biomed Opt* 2017; **22**: 045006.
- 591 39 Szabo GG, Du X, Ojjala M, Varga C, Parent JM, Soltesz I. Extended Interneuronal Network of  
592 the Dentate Gyrus. *Cell Rep* 2017; **20**: 1262–1268.
- 593 40 Johnston MV, Ammanuel S, O'Driscoll C, Wozniak A, Naidu S, Kadam SD. Twenty-four hour  
594 quantitative-EEG and in-vivo glutamate biosensor detects activity and circadian rhythm  
595 dependent biomarkers of pathogenesis in Mecp2 null mice. *Front Syst Neurosci* 2014; **8**: 118.
- 596 41 Medina-Ceja L, Pardo-Peña K, Morales-Villagrán A, Ortega-Ibarra J, López-Pérez S. Increase  
597 in the extracellular glutamate level during seizures and electrical stimulation determined using a  
598 high temporal resolution technique. *BMC Neurosci* 2015; **16**: 11.

- 599 42 Clay M, Monbouquette HG. A Detailed Model of Electroenzymatic Glutamate Biosensors To  
600 Aid in Sensor Optimization and in Applications in Vivo. *ACS Chem Neurosci* 2018; **9**: 241–251.
- 601 43 Moon J-M, Thapliyal N, Hussain KK, Goyal RN, Shim Y-B. Conducting polymer-based  
602 electrochemical biosensors for neurotransmitters: A review. *Biosens Bioelectron* 2018; **102**:  
603 540–552.
- 604 44 Sauleau P, Lapouble E, Val-Laillet D, Malbert CH. The pig model in brain imaging and  
605 neurosurgery. *Animal* 2009; **3**: 1138–1151.
- 606 45 Kang J, Boctor EM, Adams S, Kulikowicz E, Zhang HK, Koehler RC *et al.* Validation of  
607 noninvasive photoacoustic measurements of sagittal sinus oxyhemoglobin saturation in hypoxic  
608 neonatal piglets. *J Appl Physiol* 2018; **125**: 983–989.
- 609 46 American National Standard for the Safe Use of Lasers. *Annals of Internal Medicine* 1975; **82**:  
610 132.
- 611 47 Baumann MH, Ayestas MA, Partilla JS, Sink JR, Shulgin AT, Daley PF *et al.* The designer  
612 methcathinone analogs, mephedrone and methylone, are substrates for monoamine transporters  
613 in brain tissue. *Neuropsychopharmacology* 2012; **37**: 1192–1203.
- 614 48 Elmore JS, Dillon-Carter O, Partilla JS, Ellefsen KN, Concheiro M, Suzuki M *et al.*  
615 Pharmacokinetic Profiles and Pharmacodynamic Effects for Methylone and Its Metabolites in  
616 Rats. *Neuropsychopharmacology* 2017; **42**: 649–660.
- 617 49 Airan RD, Meyer RA, Ellens NPK, Rhodes KR, Farahani K, Pomper MG *et al.* Noninvasive  
618 Targeted Transcranial Neuromodulation via Focused Ultrasound Gated Drug Release from  
619 Nanoemulsions. *Nano Lett* 2017; **17**: 652–659.
- 620 50 Kang SK, Ammanuel S, Thodupunuri S, Adler DA, Johnston MV, Kadam SD. Sleep  
621 dysfunction following neonatal ischemic seizures are differential by neonatal age of insult as  
622 determined by qEEG in a mouse model. *Neurobiol Dis* 2018; **116**: 1–12.
- 623

Spatial / temporal specificity  
**fPA VSD imaging**

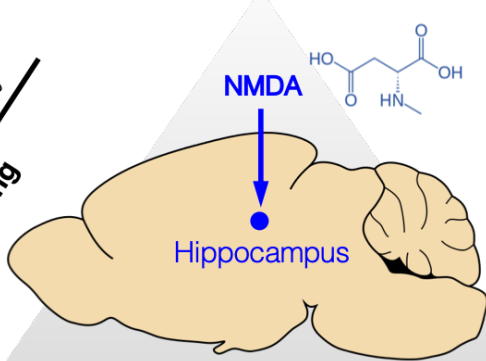

Temporal specificity  
**qEEG recording**

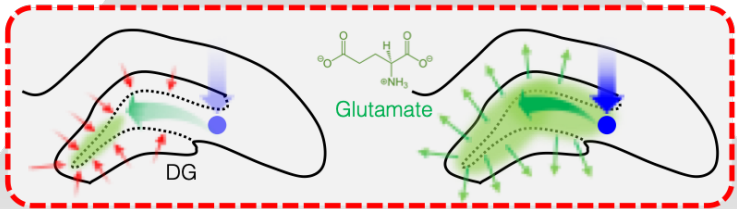

### Microdialysis

Focal neurochemical specificity

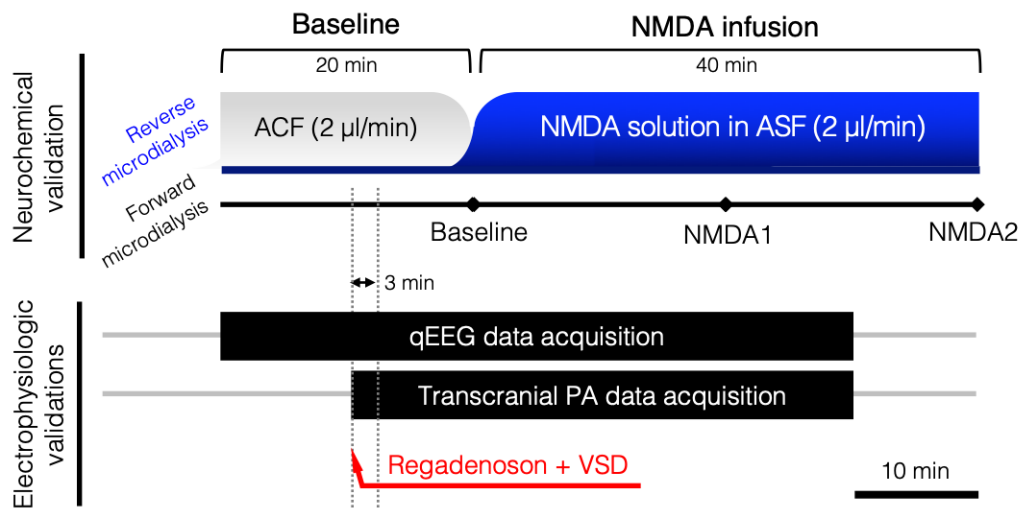

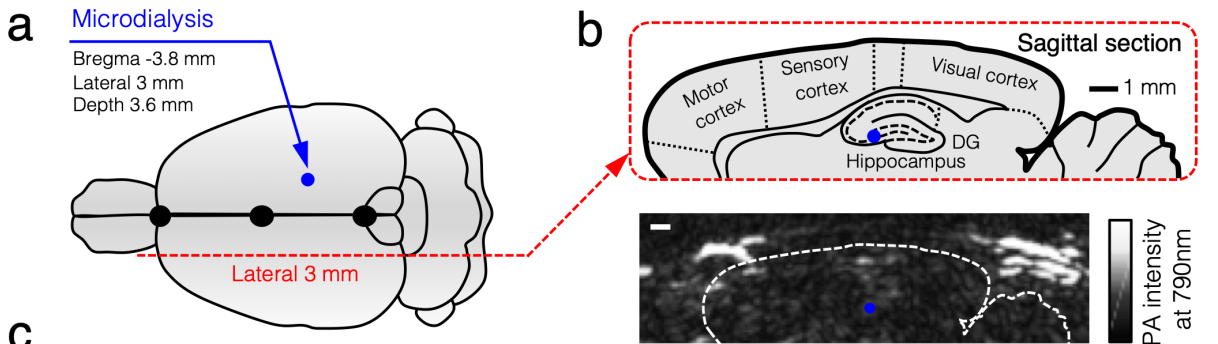



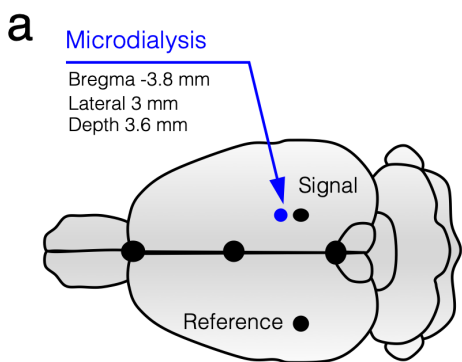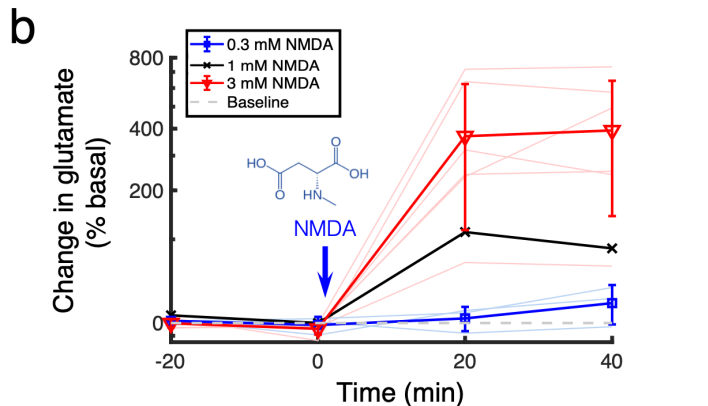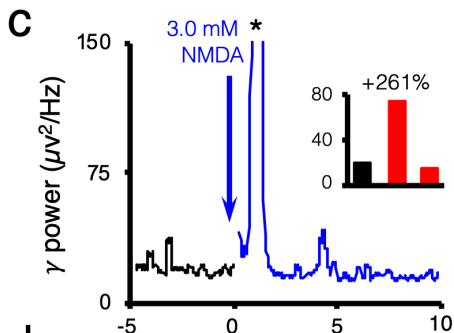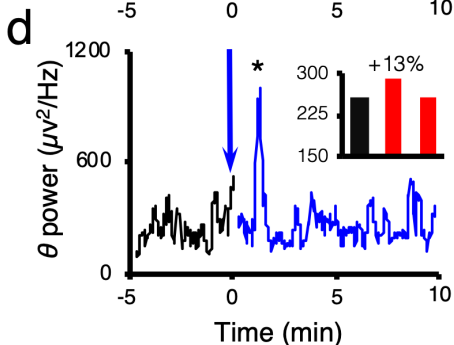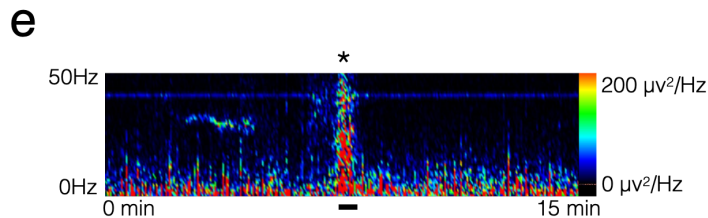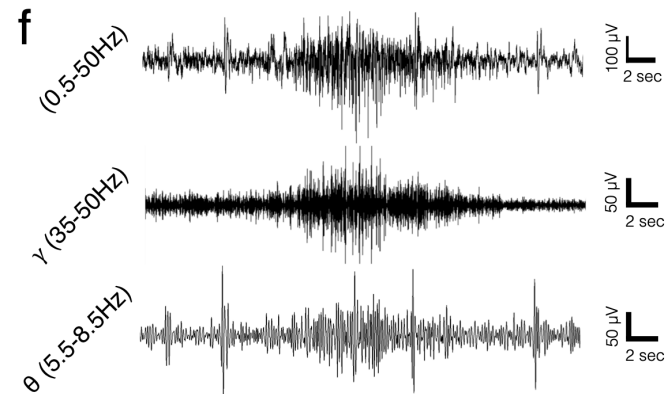

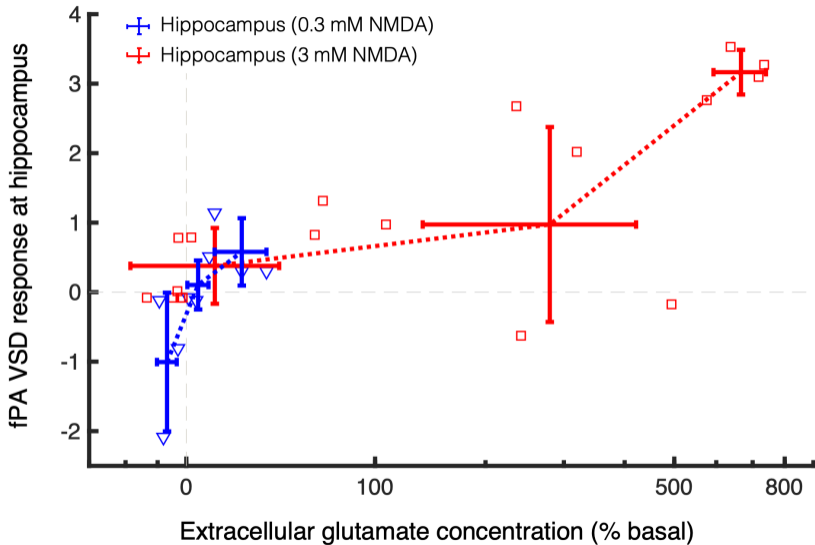

**a**

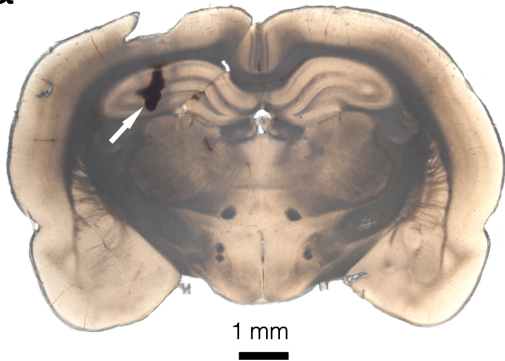

**b**

*Negative control  
(VSD-)*

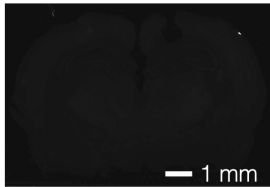

*VSD perfusion  
(VSD+)*

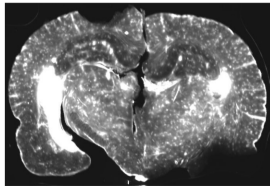

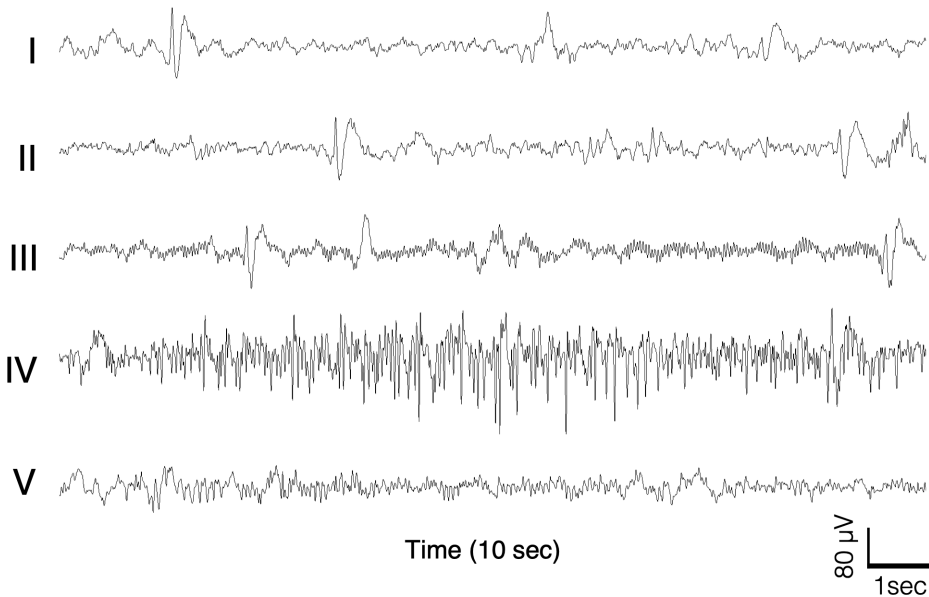

**a**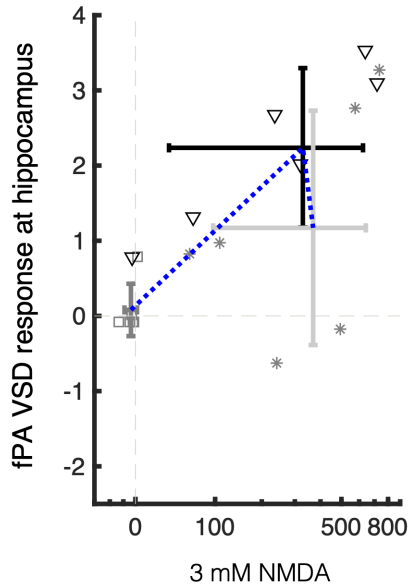**b**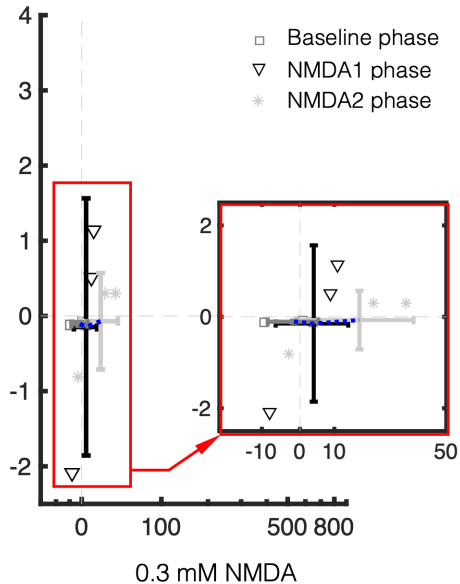

Source: https://www.biorxiv.org/content/biorxiv/early/2019/09/20/308585.full.pdf
